# Supplementary material for: Human leukocyte antigen evolutionary divergence as a novel risk factor for donor selection in acute lymphoblastic leukemia patients undergoing haploidentical hematopoietic stem cell transplantation
Source: Front Immunol. 2024 Aug 19;15:1440911. doi: 10.3389/fimmu.2024.1440911 (PMC11369896; doi:10.3389/fimmu.2024.1440911)
Supplement: Supplementary file 3 [file Table1.xlsx]

## Sheet: Sheet1
Supplementary Table 1 Univariate analysis of relapse, GVHD and DFS
Univariate analysis of relapse
Variables	HR	95%CI	P value
D_HEDclass I, Low vs High	2.297	1.190-4.436	0.013
R_HEDclass I, Low vs High	2.246	1.163-4.336	0.016
D/R_HEDclass I, Low vs High	2.021	1.060-3.855	0.033
Disease status, NR vs CR	3.265	1.658-6.431	0.001
Donor sex, male vs female	2.184	1.110-4.297	0.024
Donor-patient relation			0.113
Child-parent	1
Father-child	0.779	0.096-6.336	0.815
Mother-child	1.418	0.613-3.278	0.415
Sibling-sibling	0.508	0.178-1.447	0.205
HLA matching, 7-9/10 vs 5-6/10	0.562	0.275-1.146	0.113
Sex matching			0.154
Male-female	1
Male-male	2.671	0.814-8.759	0.105
Female-female	2.369	0.897-6.257	0.082
Female-male	1.208	0.383-3.805	0.747
Sex matching, Female-male vs others	0.495	0.194-1.264	0.142
Sex matching, mismatch vs match	0.78	0.398-1.528	0.469
Donor age(yr.)			0.772
<18	1
18-30	1.807	0.529-6.176	0.345
30-45	0.999	0.317-3.150	0.999
>=45	1.26	0.545-2.915	0.589
Donor age, >=18 vs <18	0.643	0.229-1.804	0.401
Donor age, >=30 vs <30	0.956	0.456-2.003	0.905
Donor age, >=45 vs <45	0.882	0.391-1.990	0.762
Patient age (as continuous variable)	0.992	0.960-1.024	0.607
Donor age (as continuous variable)	0.995	0.968-1.023	0.724
Univariate analysis of grade 3-4 aGVHD
Variables	HR	95%CI	P value
D/R_HEDclass II, Low vs High	0.346	0.154-0.779	0.01
Donor-patient relation			0.815
Child-parent	1
Father-child	0	0	0.976
Mother-child	0.781	0.272-2.243	0.646
Sibling-sibling	1.161	0.407-3.306	0.78
Donor age, >=45 vs <45	1.923	0.851-4.348	0.116
Donor age (yr.)			0.23
<18	1
18-30	0.316	0.04-2.502	0.275
30-45	0.724	0.257-2.042	0.542
>=45	0.433	0.185-1.016	0.054
Donor age, >=18 vs <18	1.897	0.255-13.833	0.536
Donor age, >=30 vs <30	0.925	0.393-2.176	0.858
Donor age (as continuous variable)	1.015	0.981-1.051	0.393
Donor sex (Male vs female)	0.674	0.326-1.392	0.286
Sex matching			0.23
Male-female	1
Male-male	0.518	0.127	0.359
Female-female	0.698	0.268	0.461
Female-male	0.947	0.349	0.914
Sex matching, Female-male vs others	1.335	0.564	0.511
Sex matching, mismatch vs match	0.994	0.476	0.988
HL matching, 7-9/10 vs 5-6/10	2.101	0.628	0.228
Univariate analysis of cGVHD
Variables	HR	95%CI	P value
D/R_HEDclass II, Low vs High	1.389	1.013-1.903	0.041
Donor age, >=45 vs <45	1.653	1.126-2.424	0.01
aGVHD, yes vs no	1.386	1.004-1.913	0.047
Donor-patient relation			0.953
Child-parent	1
Father-child	1.075	0.373-3.097	0.894
Mother-child	1.056	0.667-1.672	0.817
Sibling-sibling	1.142	0.707-1.847	0.587
Donor age (as continuous variable)	1.005	0.990-1.020	0.523
Donor age(yr.)			0.064
<18	1
18-30	0.534	0.248-1.149	0.108
30-45	0.748	0.444-1.259	0.274
>=45	0.602	0.408-0.886	0.01
Donor age, >=18 vs <18	1.292	0.634-2.633	0.48
Donor age, >=30 vs <30	1.008	0.680-1.194	0.969
Donor sex , male vs female	0.944	0.685-1.301	0.726
Sex matching			0.629
Male-female	1
Male-male	1.287	0.716-20313	0.398
Female-female	0.91	0.596-1.388	0.661
Female-male	1.054	0.661-1.680	0.825
Sex matching, Female-male vs others	1.004	0.682-1.477	0.985
Sex matching, mismatch vs match	1.168	0.843-1.617	0.35
HL matching, 7-9/10 vs 5-6/10	1.054	0.682-1.629	0.813
Disease status, NR vs CR	1.115	0.703-1.769	0.644
Univariate analysis of DFS
Variables	HR	95%CI	P value
D_HEDclass I, Low vs high	1.529	1.013-2.309	0.043
Disease status, NR vs CR	2.652	1.638-4.294	0
HLA matching, 7-9/10 vs 5-6/10	0.639	0.390-1.049	0.076
Age at transplant (as continuous variable)	1.007	0.988-1.027	0.464
Donor-patient relation			0.281
Child-parent	1
Father-child	0.3	0.04-2.245	0.241
Mother-child	1.005	0.582-1.736	0.986
Sibling-sibling	0.68	0.369-1.253	0.217
Donor age (as continuous variable)	1.008	0.989-1.027	0.429
Donor age(yr.)			0.679
<18	1
18-30	0.845	0.342-2.084	0.714
30-45	0.991	0.521-1.888	0.979
>=45	0.764	0.462-1.264	0.294
Donor age, >=18 vs <18	1.007	0.440-2.303	0.987
Donor age, >=30 vs <30	0.871	0.540-1.405	0.57
Donor age, >=45 vs <45	1.289	0.792-2.097	0.307
Donor sex , male vs female	1.389	0.914-2.111	0.124
Sex matching3, mismatch vs match	0.949	0.617-1.461	0.814
Sex matching2, Female-male vs others	0.786	0.464-1.332	0.371
Sex matching1			0.423
Male-female	1
Male-male	1.648	0.786-3.452	0.186
Female-female	1.345	0.766-2.363	0.303
Female-male	1.018	0.533-1.943	0.957
