# Supplementary material for: Human leukocyte antigen evolutionary divergence as a novel risk factor for donor selection in acute lymphoblastic leukemia patients undergoing haploidentical hematopoietic stem cell transplantation
Source: Front Immunol. 2024 Aug 19;15:1440911. doi: 10.3389/fimmu.2024.1440911 (PMC11369896; doi:10.3389/fimmu.2024.1440911)
Supplement: Supplementary file 4 [file Table2.xlsx]

## Sheet: Sheet1
Supplementary Table 2 Multivariate analysis
Multivariate analysis of relapse
Variables	HR	95%CI	P value
D_HEDclass I, Low vs High	1.9	0.972-3.712	0.06
R_HEDclass I, Low vs High	2.101	1.083-4.078	0.028
D/R_HEDclass I, Low vs High
Disease status, NR vs CR	2.928	1.440-5.951	0.003
Donor sex , male vs female
Donor-patient relation
Child-parent
Father-child
Mother-child
Sibling-sibling
HLA matching, 7-9/10 vs 5-6/10
Sex matching
Male-female
Male-male
Female-female
Female-male
Multivariate analysis of grade 3-4 aGVHD
Variables	HR	95%CI	P value
D/R_HEDclass II, Low vs High	0.326	0.144-0.738	0.007
Donor-patient relation
Child-parent
Father-child
Mother-child
Sibling-sibling
Donor age, >=45 vs <45	2.153	0.945-4.903	0.068
Donor sex, male vs female
Sex matching
Male-female
Male-male
Female-female
Female-male
HLA matching, 7-9/10 vs 5-6/10
Variables	HR	95%CI	P value
D/R_HEDclass II, Low vs High	0.335	0.148-0.756	0.009
Donor-patient relation
Child-parent
Father-child
Mother-child
Sibling-sibling
Donor age (as continuous variable)
Donor sex, male vs female
Sex matching
Male-female
Male-male
Female-female
Female-male
HLA matching, 7-9/10 vs 5-6/10
Multivariate analysis of cGVHD
Variables	HR	95%CI	P value
D/R_HEDclass II, Low vs High	1.329	0.956-1.847	0.091
aGVHD, yes vs no	1.438	1.024-2.018	0.036
Donor age, >=45 vs <45	1.738	1.160-2.603	0.007
Donor-patient relation
Child-parent
Father-child
Mother-child
Sibling-sibling
Sex matching
Male-female
Male-male
Female-female
Female-male
HL matching, 7-9/10 vs 5-6/10
Disease status, NR vs CR
Multivariate analysis of DFS
Variables	HR	95%CI	P value
D_HEDclass I, Low vs high	1.449	0.957-2.192	0.079
Disease status, NR vs CR	2.551	1.571-4.141	<0.0001
HLA matching, 7-9/10 vs 5-6/10
Age at transplant (as continuous variable)
